# Supplementary figures and images for: Bioactive Essential Oils from Cuban Plants: An Inspiration to Drug Development
Source: MDPI journal article supplement (doi:10.3390/plants10112515), 2021-11-19

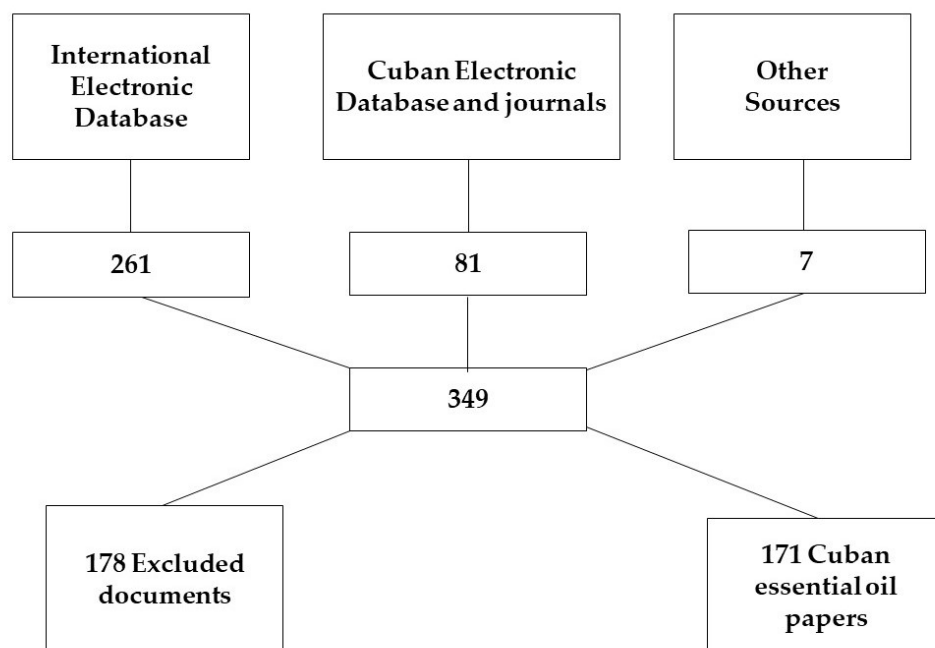

**Figure S1.** Flowchart of the screening process to select articles included in this review.

Supplement: s1 [file s1]
